# Supplementary material for: Phenotypic and Genetic Heterogeneity of Adult Patients with Hereditary Spastic Paraplegia from Serbia
Source: MDPI journal article supplement (doi:10.3390/cells11182804), 2022-09-08
Supplement: s1 [file s1]

**Supplemental Table S1.** Detailed clinical findings of Serbian patients with genetically confirmed SPG4.

| Patient | Family | Gender | Age at onset | Age | Mobility              | LL                                             | UL            | Sphincter dysfunction | Sensibility impairment    | Additional features          | NCS      | SSEP                    | Brain MRI             | Spine MRI |
|---------|--------|--------|--------------|-----|-----------------------|------------------------------------------------|---------------|-----------------------|---------------------------|------------------------------|----------|-------------------------|-----------------------|-----------|
| HSP4    | 1      | male   | 21-40        | 44  | abnormal, but no aids | hyperreflexia, weakness                        | normal        | bowel and bladder     | vibration in LL           | none                         | normal   | normal                  | normal                | normal    |
| HSP9    | 2      | male   | 6-10         | 39  | abnormal, but no aids | hyperreflexia, weakness                        | hyperreflexia | normal                | normal                    | foot deformities, dysarthria | normal   | normal                  | normal                | normal    |
| HSP10   | 2      | male   | 6-10         | 37  | abnormal, but no aids | hyperreflexia, weakness                        | hyperreflexia | normal                | normal                    | dysarthria                   | normal   | abnormal from LL and UL | single WMHL           | normal    |
| HSP11   | 3      | female | 21-40        | 60  | abnormal, but no aids | hyperreflexia, weakness, distal muscle atrophy | hyperreflexia | bladder               | vibration and touch in LL | none                         | normal   | normal                  | normal                | normal    |
| HSP12   | 3      | male   | 11-20        | 38  | abnormal, but no aids | hyperreflexia                                  | normal        | normal                | normal                    | epilepsy                     | not done | normal                  | hippocampal sclerosis | not done  |
| HSP24   | 4      | female | 21-40        | 40  | abnormal, but no aids | hyperreflexia                                  | hyperreflexia | normal                | normal                    | none                         | not done | normal                  | normal                | normal    |
| HSP32   | 5      | female | 21-40        | 34  | abnormal, but no aids | hyperreflexia, weakness                        | hyperreflexia | normal                | vibration in LL           | none                         | normal   | not done                | pineal gland cyst     | normal    |
| HSP33   | 6      | female | 41-60        | 48  | abnormal, but no aids | hyperreflexia, weakness                        | hyperreflexia | bladder               | vibration in LL           | none                         | not done | not done                | not done              | normal    |
| HSP42   | 7      | female | 41-60        | 47  | abnormal, but no aids | hyperreflexia, weakness                        | hyperreflexia | bowel and bladder     | vibration in LL           | none                         | normal   | not done                | small WMHLs           | normal    |
| HSP52   | 8      | male   | 6-10         | 42  | abnormal, but no aids | hyperreflexia, weakness, distal muscle atrophy | hyperreflexia | normal                | normal                    | none                         | normal   | normal                  | normal                | normal    |
| HSP68   | 9      | male   | 21-40        | 42  | abnormal, but no aids | normal                                         | hyperreflexia | normal                | normal                    | none                         | not done | not done                | small WMHLs           | normal    |

|               |           |        |       |    |                       |                                    |                                     |                   |                 |                                          |          |          |                                              |        |
|---------------|-----------|--------|-------|----|-----------------------|------------------------------------|-------------------------------------|-------------------|-----------------|------------------------------------------|----------|----------|----------------------------------------------|--------|
| <b>HSP80</b>  | <b>10</b> | female | 21-40 | 43 | abnormal, but no aids | hyperreflexia, weakness            | hyperreflexia, mild distal weakness | bladder and bowel | vibration in LL | mild cerebellar ataxia                   | normal   | not done | small WMHLs                                  | normal |
| <b>HSP81</b>  | <b>10</b> | male   | <1    | 33 | abnormal, but no aids | hyperreflexia, weakness            | hyperreflexia                       | bladder and bowel | vibration in LL | deafness, foot deformities               | normal   | not done | retrocerebellar cyst                         | normal |
| <b>HSP94</b>  | <b>4</b>  | male   | 21-40 | 24 | normal                | hyperreflexia                      | hyperreflexia                       | normal            | normal          | none                                     | not done | not done | normal                                       | normal |
| <b>HSP112</b> | <b>11</b> | female | 41-60 | 44 | abnormal, but no aids | asymmetric hyperreflexia, weakness | normal                              | normal            | normal          | mild dysarthria, mild cerebellar signs   | normal   | not done | WMHLs in cerebellum, mild cerebellar atrophy | normal |
| <b>HSP114</b> | <b>12</b> | female | >60   | 72 | abnormal, but no aids | hyperreflexia                      | hyperreflexia                       | bladder           | normal          | foot deformities, mild cerebellar ataxia | normal   | not done | normal                                       | normal |

LL – lower limbs, UL – upper limbs, NCS – nerve conduction studies, SSEP – somatosensory evoked potentials, MRI – muscle resonance imaging, WMHL – white matter hyperintensity lesions
